# Supplementary material
Source: HighWire-hosted journal article supplement (https://erj.ersjournals.com/content/54/5/1901508)
Supplement: inline-supplementary-material-1 [file inline-supplementary-material-1.pdf]

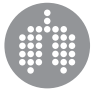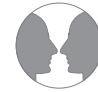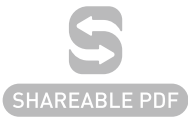

# Nontuberculosis mycobacteria infections: would there be pharmacodynamics without pharmacokinetics?

Hannah Yejin Kim<sup>1,2</sup>, Vitali Sintchenko<sup>3,4,5</sup> and Jan-Willem Alffenaar<sup>1,2</sup>

**Affiliations:** <sup>1</sup>Sydney Pharmacy School, Faculty of Medicine and Health, The University of Sydney, Sydney, Australia. <sup>2</sup>Westmead Hospital, Sydney, Australia. <sup>3</sup>Sydney Medical School, The University of Sydney, Sydney, Australia. <sup>4</sup>Centenary Institute, The University of Sydney, Sydney, Australia. <sup>5</sup>Centre for Infectious Diseases and Microbiology–Public Health, Westmead Hospital, Sydney, Australia.

**Correspondence:** Jan-Willem Alffenaar, Sydney Pharmacy School, Faculty of Medicine and Health, The University of Sydney, Sydney, NSW, 2006, Australia. E-mail: johannes.alfenaar@sydney.edu.au

 @ERSpublications

**A combination of pharmacokinetics and pharmacodynamics is required to evaluate the efficacy of antimicrobial drugs in the treatment of *Mycobacterium abscessus*** <http://bit.ly/2OGwS3C>

**Cite this article as:** Kim HY, Sintchenko V, Alffenaar J-W. Nontuberculosis mycobacteria infections: would there be pharmacodynamics without pharmacokinetics?. *Eur Respir J* 2019; 54: 1901508 [<https://doi.org/10.1183/13993003.01508-2019>].

This single-page version can be shared freely online.

*To the Editor:*

We read with great interest the recent publication by KWAK *et al.* [1] involving a meta-analysis of studies reporting treatment outcomes for *Mycobacterium abscessus* pulmonary disease (MAB-PD). The authors should be commended for identifying the association between azithromycin, amikacin and imipenem, and improved clinical outcome in MAB-PD.
